# Supplementary material for: Facile growth of centimeter-order, highly crystalline ZnWO4single crystals by the flux evaporation technique using molten NaCl
Source: Royal Society of Chemistry journal article supplement (doi:10.1039/c6ce01659f), 2016-01-01
Supplement: c6ce01659f1.pdf [file c6ce01659f1.pdf]

*Electronic Supplementary Information (ESI)*

**Facile Growth of Centimeter-order, Highly crystalline ZnWO<sub>4</sub>  
Single Crystals by the Flux Evaporation Technique using Molten  
NaCl**

*Tetsuya Yamada,<sup>a</sup> Yuta Sukegawa,<sup>b</sup> Hajime Wagata,<sup>b</sup> Kunio Yubuta,<sup>c</sup> Katsuya Teshima<sup>a, b\*</sup>*

<sup>a</sup>Center for Energy and Environmental Science Shinshu University, 4-17-1 Wakasato, Nagano 380-8553, Japan

<sup>b</sup>Department of Environmental Science & Technology, Faculty of Engineering, Shinshu University, 4-17-1 Wakasato, Nagano 380-8553, Japan

<sup>c</sup>Institute for Materials Research, Tohoku University, Sendai 980-8577, Japan

E-mail: [teshima@shinshu-u.ac.jp](mailto:teshima@shinshu-u.ac.jp)

*\*Corresponding Author: Katsuya Teshima*

Contents

Figure S1

XRD profiles of each crystal facet of a ZnWO<sub>4</sub> single crystal prepared from NaCl flux with a solute concentration of 40 mol% and a holding temperature of 1100 °C.

Figure S2

EDS spectra of a ZnWO<sub>4</sub> crystal prepared with a solute concentration of 40 mol% and a holding temperature of 1100 °C.

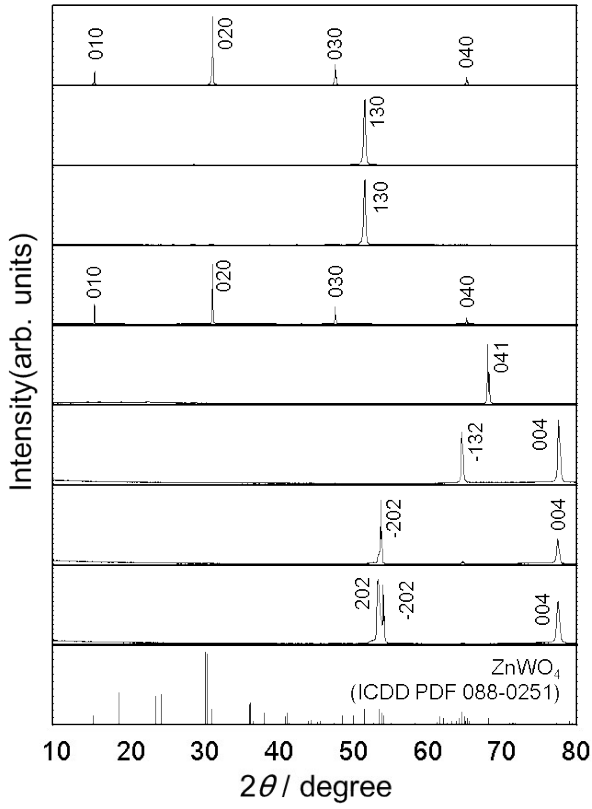

Figure S1 XRD profiles of each crystal facet of a ZnWO<sub>4</sub> crystal prepared from NaCl flux with a solute concentration of 40 mol% and a holding temperature of 1100 °C.

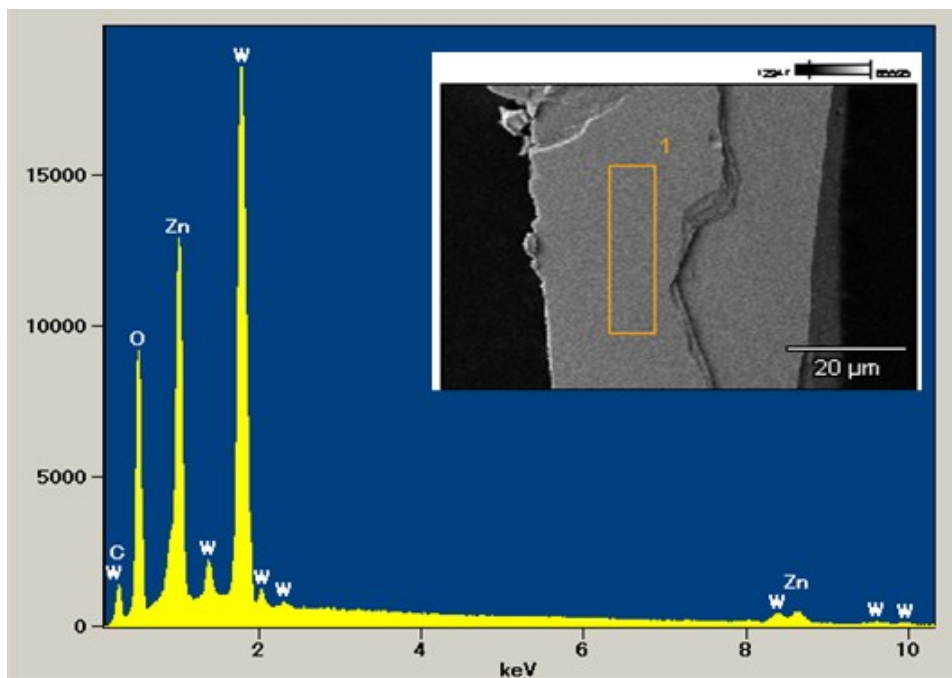

Figure S2 EDS spectra of a  $\text{ZnWO}_4$  crystal prepared with a solute concentration of 40 mol% and a holding temperature of 1100 °C. The square line in the inset indicates the EDS measuring region.
